# Supplementary material
Source: Springer Nature journal article supplement (https://www.springermedizin.de/resource/supplementary/13014_2014_1173_MOESM4_ESM.pdf/9635054)

Dose in MU

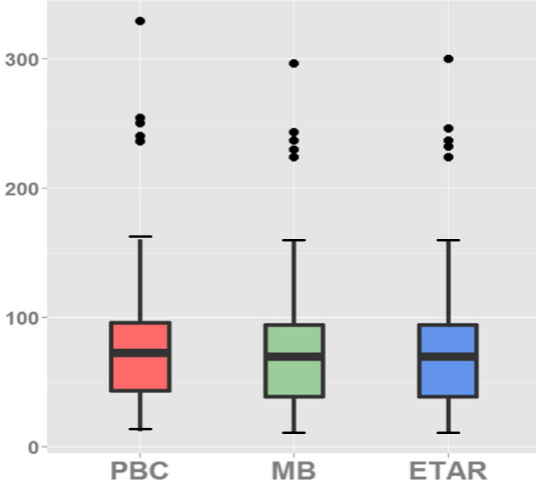

Supplement: MOESM4 [file 9635054]
